# Supplementary material
Source: PubMed Central journal article supplement (PMC4417663)
Supplement: NIHMS636215-supplement-01.pdf [file NIHMS636215-supplement-01.pdf]

# Supplementary Material

## Classification of sodium MRI data of cartilage using machine learning

September 22, 2014

Guillaume Madelin<sup>1\*</sup>, Frederick Poidevin<sup>2</sup>, Antonios Makrimalis<sup>3</sup>, Ravinder R. Regatte<sup>1</sup>

<sup>1</sup> Center for Biomedical Imaging, Department of Radiology, New York University School of Medicine, New York, NY 10016, USA

<sup>2</sup> Instituto de Astrofísica de Canarias, E-38200 La Laguna, Tenerife, Spain; Universidad de La Laguna, Dept. Astrofísica, E-38206 La Laguna, Tenerife, Spain

<sup>3</sup>Department of Physics & Astronomy, University College London, Kathleen Lonsdale Building, Gower Place, London WC1E 6BT, UK

\*Corresponding author: Center for Biomedical Imaging, Department of Radiology, New York University School of Medicine, 660 First Avenue, 4th Floor, New York, NY 10016, USA.

Email: [guillaume.madelin@nyumc.org](mailto:guillaume.madelin@nyumc.org)

# Tables

**Table S1. Individual measurements - Resubmission - All OA**

| Methods    | Options               | Measurements                    | Adj. Acc. (%) | Acc. (%)    | Sens. (%)   | Spec. (%)   |
|------------|-----------------------|---------------------------------|---------------|-------------|-------------|-------------|
| <b>DIA</b> | Linear                | <b>Min[STD]<sub>IRW</sub></b>   | <b>75.36</b>  | <b>78.7</b> | <b>82.1</b> | <b>73.7</b> |
|            |                       | Max[MEAN] <sub>IRW</sub>        | 58.49         | 70.2        | 82.1        | 52.6        |
|            |                       | Mean[STD] <sub>IRW</sub>        | 52.36         | 63.8        | 71.4        | 52.6        |
| <b>DIA</b> | Quadratic             | <b>Min[STD]<sub>IRW</sub></b>   | <b>78.62</b>  | <b>78.7</b> | <b>78.6</b> | <b>78.9</b> |
|            |                       | Mean[STD] <sub>IRW</sub>        | 67.93         | 68.1        | 67.9        | 68.4        |
|            |                       | Mean[MEAN] <sub>IRW</sub>       | 54.98         | 70.2        | 85.7        | 47.4        |
| <b>LGR</b> | Linear                | <b>Min[STD]<sub>IRW</sub></b>   | <b>75.36</b>  | <b>78.7</b> | <b>82.1</b> | <b>73.7</b> |
|            |                       | Max[MEAN] <sub>IRW</sub>        | 58.49         | 70.2        | 82.1        | 52.6        |
|            |                       | Mean[STD] <sub>IRW</sub>        | 56.36         | 63.8        | 71.4        | 52.6        |
| <b>LGR</b> | Quadratic             | <b>Min[STD]<sub>IRW</sub></b>   | <b>75.53</b>  | <b>76.6</b> | <b>75.0</b> | <b>78.9</b> |
|            |                       | Max[STD] <sub>IRW</sub>         | 71.73         | 72.3        | 71.4        | 73.7        |
|            |                       | Mean[STD] <sub>IRW</sub>        | 69.35         | 72.3        | 67.9        | 78.9        |
| <b>LNR</b> | Linear                | <b>Min[STD]<sub>IRW</sub></b>   | <b>75.36</b>  | <b>78.7</b> | <b>82.1</b> | <b>73.7</b> |
|            |                       | Max[MEAN] <sub>IRW</sub>        | 58.49         | 70.2        | 82.1        | 52.6        |
|            |                       | Mean[STD] <sub>IRW</sub>        | 56.36         | 63.8        | 71.4        | 52.6        |
| <b>LNR</b> | Quadratic             | <b>Min[STD]<sub>IRW</sub></b>   | <b>75.36</b>  | <b>78.7</b> | <b>82.1</b> | <b>73.7</b> |
|            |                       | Max[STD] <sub>IRW</sub>         | 68.64         | 70.2        | 67.9        | 73.7        |
|            |                       | Min[STD] <sub>R3D</sub>         | 67.93         | 68.1        | 67.9        | 68.4        |
| <b>KNN</b> | k = 3                 | <b>Max[MEAN]<sub>IRW</sub></b>  | <b>81.71</b>  | <b>87.2</b> | <b>92.9</b> | <b>78.9</b> |
|            |                       | Mean[STD] <sub>IRW</sub>        | 78.62         | 78.7        | 78.6        | 78.9        |
|            |                       | Max[STD] <sub>R3D</sub>         | 78.62         | 78.7        | 78.6        | 78.9        |
| <b>KNN</b> | k = 5                 | <b>Min[STD]<sub>IRW</sub></b>   | <b>79.58</b>  | <b>80.9</b> | <b>82.1</b> | <b>78.9</b> |
|            |                       | Max[MEAN] <sub>IRW</sub>        | 76.07         | 80.9        | 85.7        | 73.7        |
|            |                       | Min[MEAN] <sub>IRW</sub>        | 76.36         | 78.7        | 82.1        | 73.7        |
| <b>NAB</b> |                       | <b>Min[STD]<sub>IRW</sub></b>   | <b>78.62</b>  | <b>78.7</b> | <b>78.6</b> | <b>78.9</b> |
|            |                       | Max[STD] <sub>IRW</sub>         | 71.73         | 72.3        | 71.4        | 73.7        |
|            |                       | Mean[STD] <sub>IRW</sub>        | 69.35         | 72.3        | 67.9        | 78.9        |
| <b>NNE</b> | N <sub>HLL</sub> = 10 | <b>Min[STD]<sub>IRW</sub></b>   | <b>78.62</b>  | <b>78.7</b> | <b>78.6</b> | <b>78.9</b> |
|            |                       | Max[STD] <sub>IRW</sub>         | 70.44         | 74.5        | 78.6        | 68.4        |
|            |                       | Mean[MEAN] <sub>R3D</sub>       | 69.73         | 72.3        | 75.0        | 68.4        |
| <b>NNE</b> | N <sub>HLL</sub> = 20 | <b>Max[MEAN]<sub>IRW</sub></b>  | <b>76.07</b>  | <b>80.9</b> | <b>85.7</b> | <b>73.7</b> |
|            |                       | Min[STD] <sub>IRW</sub>         | 68.64         | 70.2        | 67.9        | 73.7        |
|            |                       | Min[MEAN] <sub>R3D</sub>        | 68.64         | 70.2        | 67.9        | 73.7        |
| <b>SVM</b> | Linear                | <b>Min[STD]<sub>IRW</sub></b>   | <b>72.44</b>  | <b>74.5</b> | <b>71.4</b> | <b>78.9</b> |
|            |                       | Mean[STD] <sub>IRW</sub>        | 69.35         | 72.3        | 67.9        | 78.9        |
|            |                       | Max[STD] <sub>IRW</sub>         | 67.93         | 68.1        | 67.9        | 68.4        |
| <b>SVM</b> | Quadratic             | <b>Min[STD]<sub>IRW</sub></b>   | <b>66.97</b>  | <b>72.3</b> | <b>64.3</b> | <b>84.2</b> |
|            |                       | Std[STD] <sub>R3D</sub>         | 64.09         | 66.0        | 67.9        | 63.2        |
|            |                       | Mean[STD] <sub>IRW</sub>        | 58.41         | 68.1        | 53.6        | 89.5        |
| <b>DTR</b> |                       | <b>Min[STD]<sub>IRW</sub></b>   | <b>86.22</b>  | <b>87.2</b> | <b>85.7</b> | <b>89.5</b> |
|            |                       | <b>Mean[MEAN]<sub>IRW</sub></b> | <b>86.22</b>  | <b>87.2</b> | <b>85.7</b> | <b>89.5</b> |
|            |                       | Mean[STD] <sub>IRW</sub>        | 85.22         | 87.2        | 89.3        | 84.2        |
| <b>TBG</b> | N <sub>T</sub> = 10   | <b>Max[MEAN]<sub>R3D</sub></b>  | <b>96.91</b>  | <b>97.9</b> | <b>96.4</b> | <b>100</b>  |
|            |                       | <b>Min[MEAN]<sub>R3D</sub></b>  | <b>96.91</b>  | <b>97.9</b> | <b>96.4</b> | <b>100</b>  |
|            |                       | Mean[STD] <sub>R3D</sub>        | 95.78         | 97.9        | 100         | 94.7        |
| <b>TBG</b> | N <sub>T</sub> = 20   | <b>Min[MEAN]<sub>IRW</sub></b>  | <b>100</b>    | <b>100</b>  | <b>100</b>  | <b>100</b>  |
|            |                       | <b>Mean[MEAN]<sub>R3D</sub></b> | <b>100</b>    | <b>100</b>  | <b>100</b>  | <b>100</b>  |
|            |                       | <b>Min[MEAN]<sub>R3D</sub></b>  | <b>100</b>    | <b>100</b>  | <b>100</b>  | <b>100</b>  |

**Table S2. Individual measurements - Holdout train/test = 0.5/0.5 - 100 iterations - All OA**

| Methods    | Options              | Measurements                   | Adj. Acc. (%)      | Acc. (%)         | Sens. (%)        | Spec. (%)        |
|------------|----------------------|--------------------------------|--------------------|------------------|------------------|------------------|
| <b>DIA</b> | Linear               | <b>Min[STD]<sub>IRW</sub></b>  | <b>70.08±9.87</b>  | <b>76.9±6.2</b>  | <b>80.8±9.8</b>  | <b>70.9±15.1</b> |
|            |                      | Mean[STD] <sub>IRW</sub>       | 58.56±7.68         | 67.1±6.2         | 72.0±11.9        | 59.4±15.4        |
|            |                      | Max[MEAN] <sub>IRW</sub>       | 52.68±10.49        | 67.2±7.2         | 81.1±12.2        | 45.7±14.2        |
| <b>DIA</b> | Quadratic            | <b>Min[STD]<sub>IRW</sub></b>  | <b>70.78±9.36</b>  | <b>75.7±7.1</b>  | <b>77.0±9.8</b>  | <b>73.8±13.5</b> |
|            |                      | Mean[STD] <sub>IRW</sub>       | 61.15±8.26         | 67.2±6.8         | 66.1±10.6        | 69.0±15.9        |
|            |                      | Max[MEAN] <sub>IRW</sub>       | 50.56±9.94         | 66.9±6.8         | 82.6±12.9        | 42.6±14.0        |
| <b>LGR</b> | Linear               | <b>Min[STD]<sub>IRW</sub></b>  | <b>71.17±10.39</b> | <b>77.9±6.9</b>  | <b>80.9±11.2</b> | <b>73.3±15.3</b> |
|            |                      | Mean[STD] <sub>IRW</sub>       | 57.47±10.2         | 67.2±7.6         | 74.1±12.3        | 56.4±17.0        |
|            |                      | Min[MEAN] <sub>IRW</sub>       | 54.89±10.22        | 66.3±8.2         | 76.5±13.2        | 50.4±14.2        |
| <b>LGR</b> | Quadratic            | <b>Min[STD]<sub>IRW</sub></b>  | <b>67.98±9.37</b>  | <b>73.0±7.2</b>  | <b>71.4±11.7</b> | <b>75.6±13.3</b> |
|            |                      | Mean[STD] <sub>IRW</sub>       | 61.76±10.17        | 68.2±8.2         | 67.3±11.9        | 69.2±17.4        |
|            |                      | Max[STD] <sub>R3D</sub>        | 56.08±9.86         | 62.8±7.0         | 65.4±12.0        | 58.8±15.6        |
| <b>LNR</b> | Linear               | <b>Min[STD]<sub>IRW</sub></b>  | <b>70.38±8.03</b>  | <b>76.4±5.8</b>  | <b>78.9±9.8</b>  | <b>72.6±12.9</b> |
|            |                      | Mean[STD] <sub>IRW</sub>       | 58.31±7.71         | 67.2±6.3         | 73.1±12.1        | 58.1±14.2        |
|            |                      | Min[MEAN] <sub>IRW</sub>       | 52.43±9.96         | 65.7±8.1         | 77.6±13.0        | 47.0±13.9        |
| <b>LNR</b> | Quadratic            | <b>Min[STD]<sub>IRW</sub></b>  | <b>68.15±9.95</b>  | <b>74.3±7.1</b>  | <b>73.6±11.8</b> | <b>75.4±15.9</b> |
|            |                      | Mean[STD] <sub>IRW</sub>       | 58.61±11.37        | 66.3±7.7         | 68.1±10.8        | 63.6±20.2        |
|            |                      | Max[STD] <sub>R3D</sub>        | 54.99±10.71        | 62.2±8.4         | 63.4±14.3        | 59.9±16.6        |
| <b>KNN</b> | k = 3                | <b>Min[STD]<sub>IRW</sub></b>  | <b>63.56±9.84</b>  | <b>69.9±7.7</b>  | <b>71.8±12.2</b> | <b>67.0±14.9</b> |
|            |                      | Max[STD] <sub>IRW</sub>        | 54.2±10.7          | 61.5±7.9         | 62.6±13.8        | 59.9±17.6        |
|            |                      | Mean[STD] <sub>IRW</sub>       | 53.91±12.32        | 62.6±8.0         | 65.5±13.2        | 58.1±21.2        |
| <b>KNN</b> | k = 5                | <b>Min[STD]<sub>IRW</sub></b>  | <b>66.95±8.92</b>  | <b>72.5±6.3</b>  | <b>74.9±9.2</b>  | <b>68.7±14.1</b> |
|            |                      | Mean[STD] <sub>IRW</sub>       | 54.67±10.51        | 63.8±7.3         | 63.4±15.1        | 64.4±21.6        |
|            |                      | Max[MEAN] <sub>IRW</sub>       | 53.18±13.23        | 62.6±10.3        | 68.5±14.7        | 53.3±19.2        |
| <b>NAB</b> |                      | <b>Min[STD]<sub>IRW</sub></b>  | <b>68.39±9.63</b>  | <b>74.1±7.3</b>  | <b>76.1±10.4</b> | <b>71.0±14.3</b> |
|            |                      | Mean[STD] <sub>IRW</sub>       | 61.51±10.08        | 68.3±6.9         | 68.1±10.2        | 68.7±18.2        |
|            |                      | Mean[STD] <sub>R3D</sub>       | 51.22±12.32        | 61.3±7.4         | 66.4±15.5        | 53.4±21.3        |
| <b>NNE</b> | N <sub>HL</sub> = 10 | <b>Min[STD]<sub>IRW</sub></b>  | <b>50.72±19.58</b> | <b>65.3±11.7</b> | <b>76.6±13.8</b> | <b>47.7±28.7</b> |
|            |                      | Mean[STD] <sub>IRW</sub>       | 42.88±17.69        | 61.1±9.1         | 77.3±13.2        | 36.0±26.5        |
|            |                      | Max[STD] <sub>IRW</sub>        | 40.48±16.77        | 56.0±11.1        | 68.9±14.6        | 35.9±24.6        |
| <b>NNE</b> | N <sub>HL</sub> = 20 | <b>Min[STD]<sub>IRW</sub></b>  | <b>49.02±18.25</b> | <b>62.7±11.6</b> | <b>72.9±16.0</b> | <b>46.8±26.9</b> |
|            |                      | Mean[MEAN] <sub>IRW</sub>      | 46.37±14.55        | 64.0±11.2        | 80.1±17.1        | 39.0±20.1        |
|            |                      | Min[MEAN] <sub>IRW</sub>       | 46.35±16.35        | 62.9±10.8        | 78.2±13.7        | 39.1±21.6        |
| <b>SVM</b> | Linear               | <b>Min[STD]<sub>IRW</sub></b>  | <b>69.68±7.44</b>  | <b>74.2±6.8</b>  | <b>69.8±9.8</b>  | <b>81.1±10.8</b> |
|            |                      | Mean[STD] <sub>IRW</sub>       | 66.56±8.06         | 70.7±7.4         | 65.9±9.9         | 78.3±11.0        |
|            |                      | Max[STD] <sub>IRW</sub>        | 60.13±11.66        | 67.1±8.9         | 64.9±13.6        | 70.7±18.9        |
| <b>SVM</b> | Quadratic            | <b>Min[STD]<sub>IRW</sub></b>  | <b>63.99±9.76</b>  | <b>70.7±7.0</b>  | <b>64.4±12.2</b> | <b>80.4±15.0</b> |
|            |                      | Mean[STD] <sub>IRW</sub>       | 60.24±10.27        | 67.7±7.9         | 57.3±11.8        | 84.0±13.5        |
|            |                      | Max[STD] <sub>R3D</sub>        | 53.15±9.57         | 61.1±7.8         | 50.1±11.5        | 78.2±14.7        |
| <b>DTR</b> |                      | <b>Min[STD]<sub>IRW</sub></b>  | <b>60.89±14.98</b> | <b>69.3±10.2</b> | <b>72.1±15.2</b> | <b>65.0±21.0</b> |
|            |                      | Max[MEAN] <sub>IRW</sub>       | 55.3±13.59         | 66.9±8.0         | 73.0±14.5        | 57.4±24.1        |
|            |                      | Min[MEAN] <sub>IRW</sub>       | 53.04±11.29        | 65.3±6.8         | 71.5±16.8        | 55.6±22.6        |
| <b>TBG</b> | N <sub>T</sub> = 10  | <b>Max[MEAN]<sub>IRW</sub></b> | <b>60.44±12.47</b> | <b>68.8±9.2</b>  | <b>72.3±14.8</b> | <b>63.3±19.1</b> |
|            |                      | Mean[STD] <sub>IRW</sub>       | 54.96±12.06        | 63.0±9.2         | 67.6±13.9        | 55.8±17.9        |
|            |                      | Min[STD] <sub>IRW</sub>        | 54.87±11.09        | 62.5±8.7         | 65.1±14.3        | 58.6±16.6        |
| <b>TBG</b> | N <sub>T</sub> = 20  | <b>Max[MEAN]<sub>IRW</sub></b> | <b>60.17±12.66</b> | <b>69.9±9.2</b>  | <b>76.3±13.4</b> | <b>60.0±19.3</b> |
|            |                      | Min[STD] <sub>IRW</sub>        | 54.46±11.09        | 61.5±7.9         | 64.7±11.3        | 56.4±17.3        |
|            |                      | Max[STD] <sub>IRW</sub>        | 56.63±11.51        | 61.3±10.0        | 63.1±15.4        | 58.3±16.5        |

**Table S3. Individual measurements - Resubmission - Early OA**

| Methods    | Options              | Measurements                    | Adj. Acc. (%) | Acc. (%)    | Sens. (%)   | Spec. (%)   |
|------------|----------------------|---------------------------------|---------------|-------------|-------------|-------------|
| <b>DIA</b> | Linear               | <b>Min[STD]<sub>IRW</sub></b>   | <b>79.62</b>  | <b>81.0</b> | <b>82.6</b> | <b>78.9</b> |
|            |                      | Mean[STD] <sub>IRW</sub>        | 69.42         | 71.4        | 73.9        | 68.4        |
|            |                      | Max[MEAN] <sub>IRW</sub>        | 56.52         | 64.3        | 73.9        | 52.6        |
| <b>DIA</b> | Quadratic            | <b>Min[STD]<sub>IRW</sub></b>   | <b>78.36</b>  | <b>78.6</b> | <b>78.3</b> | <b>78.9</b> |
|            |                      | Mean[STD] <sub>IRW</sub>        | 74.67         | 76.2        | 73.9        | 78.9        |
|            |                      | Min[MEAN] <sub>R3D</sub>        | 69.42         | 71.4        | 73.9        | 68.4        |
| <b>LGR</b> | Linear               | <b>Min[STD]<sub>IRW</sub></b>   | <b>79.62</b>  | <b>81.0</b> | <b>82.6</b> | <b>78.9</b> |
|            |                      | Mean[STD] <sub>IRW</sub>        | 69.42         | 71.4        | 73.9        | 68.4        |
|            |                      | Max[MEAN] <sub>IRW</sub>        | 56.52         | 64.3        | 73.9        | 52.6        |
| <b>LGR</b> | Quadratic            | <b>Mean[STD]<sub>IRW</sub></b>  | <b>75.47</b>  | <b>78.6</b> | <b>73.9</b> | <b>84.2</b> |
|            |                      | Min[STD] <sub>IRW</sub>         | 70.98         | 73.8        | 69.6        | 78.9        |
|            |                      | Max[STD] <sub>IRW</sub>         | 67.29         | 71.4        | 65.2        | 78.9        |
| <b>LNR</b> | Linear               | <b>Min[STD]<sub>IRW</sub></b>   | <b>78.36</b>  | <b>78.6</b> | <b>78.3</b> | <b>78.9</b> |
|            |                      | Mean[STD] <sub>IRW</sub>        | 69.42         | 71.4        | 73.9        | 68.4        |
|            |                      | Max[MEAN] <sub>IRW</sub>        | 56.52         | 64.3        | 73.9        | 52.6        |
| <b>LNR</b> | Quadratic            | <b>Mean[STD]<sub>IRW</sub></b>  | <b>74.67</b>  | <b>76.2</b> | <b>73.9</b> | <b>78.9</b> |
|            |                      | Min[STD] <sub>IRW</sub>         | 74.67         | 76.2        | 73.9        | 78.9        |
|            |                      | Mean[STD] <sub>R3D</sub>        | 64.33         | 66.7        | 69.6        | 63.2        |
| <b>KNN</b> | k = 3                | <b>Max[MEAN]<sub>IRW</sub></b>  | <b>84.71</b>  | <b>85.7</b> | <b>87.0</b> | <b>84.2</b> |
|            |                      | Min[STD] <sub>IRW</sub>         | 79.62         | 81.0        | 82.6        | 78.9        |
|            |                      | Mean[MEAN] <sub>R3D</sub>       | 79.62         | 81.0        | 82.6        | 78.9        |
| <b>KNN</b> | k = 5                | <b>Min[STD]<sub>IRW</sub></b>   | <b>79.62</b>  | <b>81.0</b> | <b>82.6</b> | <b>78.9</b> |
|            |                      | Max[MEAN] <sub>IRW</sub>        | 78.36         | 78.6        | 78.3        | 78.9        |
|            |                      | Mean[STD] <sub>IRW</sub>        | 74.67         | 76.2        | 73.9        | 78.9        |
| <b>NAB</b> |                      | <b>Min[STD]<sub>IRW</sub></b>   | <b>78.36</b>  | <b>78.6</b> | <b>78.3</b> | <b>78.9</b> |
|            |                      | Mean[STD] <sub>IRW</sub>        | 74.67         | 76.2        | 73.9        | 78.9        |
|            |                      | Mean[STD] <sub>R3D</sub>        | 70.19         | 71.4        | 69.6        | 73.7        |
| <b>NNE</b> | N <sub>HL</sub> = 10 | <b>Mean[STD]<sub>IRW</sub></b>  | <b>69.42</b>  | <b>71.4</b> | <b>73.9</b> | <b>68.4</b> |
|            |                      | Min[STD] <sub>IRW</sub>         | 65.18         | 73.8        | 60.9        | 89.5        |
|            |                      | Mean[MEAN] <sub>IRW</sub>       | 57.0          | 66.7        | 52.2        | 84.2        |
| <b>NNE</b> | N <sub>HL</sub> = 20 | <b>Max[MEAN]<sub>IRW</sub></b>  | <b>79.62</b>  | <b>81.0</b> | <b>82.6</b> | <b>78.9</b> |
|            |                      | Min[MEAN] <sub>IRW</sub>        | 70.22         | 73.8        | 78.3        | 68.4        |
|            |                      | Mean[MEAN] <sub>IRW</sub>       | 62.41         | 71.4        | 82.6        | 57.9        |
| <b>SVM</b> | Linear               | <b>Mean[STD]<sub>IRW</sub></b>  | <b>74.67</b>  | <b>76.2</b> | <b>73.9</b> | <b>78.9</b> |
|            |                      | <b>Min[STD]<sub>IRW</sub></b>   | <b>74.67</b>  | <b>76.2</b> | <b>73.9</b> | <b>78.9</b> |
|            |                      | Max[STD] <sub>IRW</sub>         | 73.73         | 73.8        | 73.9        | 73.7        |
| <b>SVM</b> | Quadratic            | <b>Min[STD]<sub>IRW</sub></b>   | <b>68.08</b>  | <b>73.8</b> | <b>65.2</b> | <b>84.2</b> |
|            |                      | Mean[STD] <sub>IRW</sub>        | 60.7          | 69.0        | 56.5        | 84.2        |
|            |                      | Max[STD] <sub>R3D</sub>         | 56.21         | 64.3        | 52.2        | 78.9        |
| <b>DTR</b> |                      | <b>Min[STD]<sub>IRW</sub></b>   | <b>85.51</b>  | <b>88.1</b> | <b>91.3</b> | <b>84.2</b> |
|            |                      | <b>Min[MEAN]<sub>R3D</sub></b>  | <b>85.51</b>  | <b>88.1</b> | <b>91.3</b> | <b>84.2</b> |
|            |                      | Mean[STD] <sub>R3D</sub>        | 84.71         | 85.7        | 87.0        | 84.2        |
| <b>TBG</b> | N <sub>T</sub> = 10  | <b>Mean[MEAN]<sub>IRW</sub></b> | <b>100</b>    | <b>100</b>  | <b>100</b>  | <b>100</b>  |
|            |                      | <b>Max[MEAN]<sub>IRW</sub></b>  | <b>100</b>    | <b>100</b>  | <b>100</b>  | <b>100</b>  |
|            |                      | <b>Mean[MEAN]<sub>R3D</sub></b> | <b>100</b>    | <b>100</b>  | <b>100</b>  | <b>100</b>  |
| <b>TBG</b> | N <sub>T</sub> = 20  | <b>Mean[STD]<sub>IRW</sub></b>  | <b>100</b>    | <b>100</b>  | <b>100</b>  | <b>100</b>  |
|            |                      | <b>Mean[MEAN]<sub>IRW</sub></b> | <b>100</b>    | <b>100</b>  | <b>100</b>  | <b>100</b>  |
|            |                      | <b>Max[MEAN]<sub>IRW</sub></b>  | <b>100</b>    | <b>100</b>  | <b>100</b>  | <b>100</b>  |

**Table S4. Individual measurements - Holdout train/test = 0.5/0.5 - 100 iterations - Early OA**

| Methods    | Options              | Measurements                    | Adj. Acc. (%)      | Acc. (%)         | Sens. (%)        | Spec. (%)        |
|------------|----------------------|---------------------------------|--------------------|------------------|------------------|------------------|
| <b>DIA</b> | Linear               | <b>Min[STD]<sub>JIRW</sub></b>  | <b>73.19±8.56</b>  | <b>78.3±6.9</b>  | <b>79.4±11.7</b> | <b>77.0±11.9</b> |
|            |                      | Mean[STD] <sub>JIRW</sub>       | 65.29±8.91         | 71.7±6.7         | 73.0±10.0        | 70.1±16.2        |
|            |                      | Min[MEAN] <sub>R3D</sub>        | 54.70±11.81        | 64.9±7.5         | 74.3±10.7        | 53.4±19.0        |
| <b>DIA</b> | Quadratic            | <b>Min[STD]<sub>JIRW</sub></b>  | <b>70.25±8.02</b>  | <b>75.3±6.7</b>  | <b>73.9±11.6</b> | <b>77.1±12.2</b> |
|            |                      | Mean[STD] <sub>JIRW</sub>       | 69.65±9.66         | 74.7±8.2         | 72.0±9.6         | 78.0±15.0        |
|            |                      | Max[STD] <sub>JIRW</sub>        | 59.86±9.74         | 66.3±7.9         | 66.1±14.3        | 66.6±14.2        |
| <b>LGR</b> | Linear               | <b>Min[STD]<sub>JIRW</sub></b>  | <b>73.63±8.42</b>  | <b>78.0±6.9</b>  | <b>77.9±11.7</b> | <b>78.2±10.2</b> |
|            |                      | Mean[STD] <sub>JIRW</sub>       | 65.30±9.50         | 72.1±6.6         | 75.8±10.3        | 67.4±15.7        |
|            |                      | Min[MEAN] <sub>R3D</sub>        | 57.14±11.59        | 65.8±7.6         | 73.2±10.2        | 56.9±18.1        |
| <b>LGR</b> | Quadratic            | <b>Min[STD]<sub>JIRW</sub></b>  | <b>67.53±9.99</b>  | <b>73.1±7.7</b>  | <b>70.7±13.5</b> | <b>76.1±13.1</b> |
|            |                      | Mean[STD] <sub>JIRW</sub>       | 62.96±12.34        | 70.0±9.2         | 66.1±15.6        | 74.8±16.8        |
|            |                      | Max[STD] <sub>JIRW</sub>        | 60.18±9.32         | 67.9±6.9         | 62.2±15.2        | 74.8±14.5        |
| <b>LNR</b> | Linear               | <b>Min[STD]<sub>JIRW</sub></b>  | <b>72.51±8.93</b>  | <b>77.4±7.4</b>  | <b>78.3±11.3</b> | <b>76.2±11.9</b> |
|            |                      | Mean[STD] <sub>JIRW</sub>       | 65.13±8.5          | 71.5±5.9         | 74.8±10.6        | 67.3±14.5        |
|            |                      | Min[MEAN] <sub>R3D</sub>        | 58.66±12.02        | 55.8±8.7         | 71.8±11.2        | 60.8±19.2        |
| <b>LNR</b> | Quadratic            | <b>Min[STD]<sub>JIRW</sub></b>  | <b>68.09±9.81</b>  | <b>73.7±7.6</b>  | <b>70.1±13.7</b> | <b>78.0±11.9</b> |
|            |                      | Mean[STD] <sub>JIRW</sub>       | 66.41±10.04        | 71.7±8.1         | 70.3±11.6        | 73.3±15.1        |
|            |                      | Max[STD] <sub>JIRW</sub>        | 55.57±9.75         | 64.3±7.1         | 55.8±14.4        | 74.7±16.9        |
| <b>KNN</b> | k = 3                | <b>Min[STD]<sub>JIRW</sub></b>  | <b>65.48±10.38</b> | <b>71.3±7.6</b>  | <b>71.4±13.2</b> | <b>71.2±14.4</b> |
|            |                      | Max[MEAN] <sub>JIRW</sub>       | 62.62±12.4         | 68.9±10.1        | 67.9±13.6        | 70.1±18.1        |
|            |                      | Mean[STD] <sub>JIRW</sub>       | 61.03±12.19        | 68.7±8.6         | 70.3±16.2        | 66.8±17.3        |
| <b>KNN</b> | k = 5                | <b>Min[STD]<sub>JIRW</sub></b>  | <b>68.94±8.76</b>  | <b>74.1±6.8</b>  | <b>72.0±12.5</b> | <b>76.7±11.3</b> |
|            |                      | Max[MEAN] <sub>JIRW</sub>       | 61.36±12.79        | 69.9±8.7         | 73.5±15.4        | 65.3±20.0        |
|            |                      | Mean[STD] <sub>JIRW</sub>       | 56.93±13.08        | 65.6±9.6         | 65.2±16.1        | 66.2±22.0        |
| <b>NAB</b> |                      | <b>Min[STD]<sub>JIRW</sub></b>  | <b>69.99±9.74</b>  | <b>75.5±7.9</b>  | <b>75.8±12.8</b> | <b>75.0±12.6</b> |
|            |                      | Mean[STD] <sub>JIRW</sub>       | 68.77±9.53         | 74.1±7.7         | 71.7±12.0        | 76.9±13.0        |
|            |                      | Max[STD] <sub>R3D</sub>         | 56.30±11.48        | 64.9±8.4         | 61.6±15.2        | 68.8±19.8        |
| <b>NNE</b> | N <sub>HL</sub> = 10 | <b>Min[STD]<sub>JIRW</sub></b>  | <b>53.07±21.0</b>  | <b>65.7±13.8</b> | <b>74.8±16.6</b> | <b>54.6±31.2</b> |
|            |                      | Mean[STD] <sub>JIRW</sub>       | 49.35±19.42        | 62.7±12.1        | 73.6±17.5        | 49.4±29.9        |
|            |                      | Max[STD] <sub>JIRW</sub>        | 43.89±15.57        | 58.4±11.3        | 71.8±17.6        | 42.0±24.6        |
| <b>NNE</b> | N <sub>HL</sub> = 20 | <b>Min[STD]<sub>JIRW</sub></b>  | <b>52.70±22.24</b> | <b>64.5±15.0</b> | <b>73.2±16.4</b> | <b>53.8±31.1</b> |
|            |                      | Min[MEAN] <sub>JIRW</sub>       | 46.49±18.02        | 60.9±12.6        | 76.5±16.2        | 41.8±24.4        |
|            |                      | Mean[STD] <sub>JIRW</sub>       | 44.70±20.37        | 59.3±13.0        | 71.5±16.3        | 44.4±32.0        |
| <b>SVM</b> | Linear               | <b>Mean[STD]<sub>JIRW</sub></b> | <b>70.46±9.36</b>  | <b>74.5±7.9</b>  | <b>72.1±10.9</b> | <b>77.4±11.3</b> |
|            |                      | Min[STD] <sub>JIRW</sub>        | 70.40±9.20         | 75.4±8.3         | 71.4±12.9        | 80.2±10.5        |
|            |                      | Max[STD] <sub>JIRW</sub>        | 63.04±11.57        | 70.3±7.9         | 69.7±13.6        | 71.0±18.0        |
| <b>SVM</b> | Quadratic            | <b>Min[STD]<sub>JIRW</sub></b>  | <b>64.82±9.42</b>  | <b>72.2±7.4</b>  | <b>62.7±11.9</b> | <b>83.8±12.8</b> |
|            |                      | Mean[STD] <sub>JIRW</sub>       | 61.22±10.44        | 70.0±8.5         | 58.2±13.9        | 84.3±12.6        |
|            |                      | Max[STD] <sub>R3D</sub>         | 53.34±8.85         | 66.0±6.4         | 48.7±12.1        | 87.0±14.6        |
| <b>DTR</b> |                      | <b>Mean[STD]<sub>JIRW</sub></b> | <b>61.72±13.61</b> | <b>69.6±9.1</b>  | <b>66.3±16.1</b> | <b>73.7±19.6</b> |
|            |                      | Min[STD] <sub>JIRW</sub>        | 61.51±13.37        | 69.0±11.3        | 65.9±19.9        | 72.8±15.5        |
|            |                      | Max[MEAN] <sub>JIRW</sub>       | 55.60±16.98        | 67.1±10.8        | 74.3±17.6        | 58.3±25.9        |
| <b>TBG</b> | N <sub>T</sub> = 10  | <b>Max[MEAN]<sub>JIRW</sub></b> | <b>61.41±12.83</b> | <b>68.9±9.9</b>  | <b>70.5±16.6</b> | <b>67.0±18.5</b> |
|            |                      | Mean[STD] <sub>JIRW</sub>       | 57.62±10.94        | 64.3±9.2         | 64.0±13.5        | 64.7±17.1        |
|            |                      | Min[STD] <sub>JIRW</sub>        | 55.98±11.96        | 63.7±9.3         | 62.1±16.3        | 65.6±18.4        |
| <b>TBG</b> | N <sub>T</sub> = 20  | <b>Max[MEAN]<sub>JIRW</sub></b> | <b>63.16±12.33</b> | <b>70.1±10.1</b> | <b>73.5±13.2</b> | <b>65.9±17.7</b> |
|            |                      | Mean[STD] <sub>JIRW</sub>       | 59.73±11.30        | 66.3±8.1         | 66.5±12.0        | 66.1±17.8        |
|            |                      | Min[MEAN] <sub>JIRW</sub>       | 54.79±10.89        | 63.4±8.5         | 69.2±15.7        | 56.2±16.2        |

**Table S5. Multi measurements - Holdout train/test = 0.5/0.5 - 100 iterations - Data from FS - All OA**

| Methods               | FS | Adj. Acc. (%) | Acc. (%)  | Sens. (%) | Spec. (%) | Data                      |
|-----------------------|----|---------------|-----------|-----------|-----------|---------------------------|
| <b>DIA</b>            | B  | 66.40±11.70   | 72.8±9.7  | 73.6±14.3 | 71.4±15.4 | Mean[MEAN] <sub>R3D</sub> |
|                       | F  | 65.56±10.79   | 72.9±7.0  | 76.2±17.9 | 67.7±17.3 | Min[STD] <sub>R3D</sub>   |
| Linear                | B  | 51.02±15.10   | 69.7±8.4  | 87.5±10.7 | 42.1±20.2 | Min[STD] <sub>R3D</sub>   |
|                       | F  | 71.17±6.91    | 76.0±5.8  | 76.4±10.3 | 75.2±10.8 | Min[STD] <sub>JRW</sub>   |
| <b>DIA</b>            | B  | 63.98±10.43   | 70.3±9.6  | 72.1±13.7 | 67.6±15.4 | Min[MEAN] <sub>R3D</sub>  |
|                       | F  | 66.40±11.60   | 75.5±7.0  | 82.0±10.1 | 65.3±18.2 | Max[STD] <sub>JRW</sub>   |
| Linear                | B  | 56.81±11.8    | 63.4±9.9  | 65.2±14.3 | 60.6±16.7 | Max[STD] <sub>JRW</sub>   |
|                       | F  | 61.75±12.41   | 68.4±10.4 | 69.8±15.6 | 66.3±16.3 | Min[STD] <sub>JRW</sub>   |
| <b>LGR</b>            | B  | 67.22±11      | 74.0±8.7  | 76.4±12.2 | 70.3±16.8 | Mean[MEAN] <sub>R3D</sub> |
|                       | F  | 63.88±9.78    | 71.0±7.0  | 73.4±12.1 | 67.1±15.9 | Min[STD] <sub>R3D</sub>   |
| Linear                | B  | 51.29±11.50   | 58.4±10.3 | 61.0±14.1 | 54.4±17.3 | Mean[STD] <sub>R3D</sub>  |
|                       | F  | 68.65±10.19   | 75.1±7.5  | 76.6±11.3 | 72.7±15.7 | Min[STD] <sub>JRW</sub>   |
| <b>LGR</b>            | B  | 64.62±12.09   | 71.5±9.4  | 75.6±11.7 | 65.1±16.3 | Mean[MEAN] <sub>R3D</sub> |
|                       | F  | 57.62±11.94   | 67.4±8.1  | 74.1±12.9 | 57.0±18.1 | Mean[MEAN] <sub>JRW</sub> |
| Quadratic             | B  | 60.08±13.19   | 68.4±9.3  | 71.7±14.7 | 63.2±20.0 | Max[STD] <sub>R3D</sub>   |
|                       | F  | 57.31±10.64   | 64.5±8.3  | 65.1±12.3 | 63.6±18.6 | Min[STD] <sub>JRW</sub>   |
| <b>LNR</b>            | B  | 66.51±9.45    | 71.9±7.7  | 71.6±11.9 | 72.4±13.4 | Mean[STD] <sub>JRW</sub>  |
|                       | F  | 66.07±10.51   | 71.9±8.1  | 69.9±12.7 | 75.1±14.9 | Min[STD] <sub>JRW</sub>   |
| Linea                 | B  | 48.52±12.81   | 61.4±10.3 | 72.3±15.5 | 44.4±18.9 | Min[MEAN] <sub>R3D</sub>  |
|                       | F  | 53.38±12.86   | 63.5±9.1  | 56.5±17.4 | 74.3±23.3 | Min[STD] <sub>JRW</sub>   |
| <b>LNR</b>            | B  | 64.62±12.09   | 71.5±9.4  | 75.6±11.7 | 65.1±16.3 | Mean[MEAN] <sub>R3D</sub> |
|                       | F  | 57.62±11.94   | 67.4±8.1  | 74.1±12.9 | 57.0±18.1 | Mean[MEAN] <sub>JRW</sub> |
| Quadratic             | B  | 60.08±13.19   | 68.4±9.3  | 71.7±14.7 | 63.2±20.0 | Max[STD] <sub>R3D</sub>   |
|                       | F  | 57.31±10.64   | 64.5±8.3  | 65.1±12.3 | 63.6±18.6 | Min[STD] <sub>JRW</sub>   |
| <b>KNN</b>            | B  | 66.51±9.45    | 71.9±7.7  | 71.6±11.9 | 72.4±13.4 | Mean[STD] <sub>JRW</sub>  |
|                       | F  | 66.07±10.51   | 71.9±8.1  | 69.9±12.7 | 75.1±14.9 | Min[STD] <sub>JRW</sub>   |
| k = 3                 | B  | 48.52±12.81   | 61.4±10.3 | 72.3±15.5 | 44.4±18.9 | Min[MEAN] <sub>R3D</sub>  |
|                       | F  | 53.38±12.86   | 63.5±9.1  | 56.5±17.4 | 74.3±23.3 | Min[STD] <sub>JRW</sub>   |
| <b>KNN</b>            | B  | 60.08±13.19   | 68.4±9.3  | 71.7±14.7 | 63.2±20.0 | Max[STD] <sub>R3D</sub>   |
|                       | F  | 57.31±10.64   | 64.5±8.3  | 65.1±12.3 | 63.6±18.6 | Min[STD] <sub>JRW</sub>   |
| k = 5                 | B  | 66.51±9.45    | 71.9±7.7  | 71.6±11.9 | 72.4±13.4 | Mean[STD] <sub>JRW</sub>  |
|                       | F  | 66.07±10.51   | 71.9±8.1  | 69.9±12.7 | 75.1±14.9 | Min[STD] <sub>JRW</sub>   |
| <b>NAB</b>            | B  | 48.52±12.81   | 61.4±10.3 | 72.3±15.5 | 44.4±18.9 | Min[MEAN] <sub>R3D</sub>  |
|                       | F  | 53.38±12.86   | 63.5±9.1  | 56.5±17.4 | 74.3±23.3 | Min[STD] <sub>JRW</sub>   |
| N <sub>HIL</sub> = 10 | B  | 55.39±14.87   | 64.7±10.6 | 68.9±16.5 | 58.2±22.5 | Max[MEAN] <sub>R3D</sub>  |
|                       | F  | 44.58±18.53   | 60.0±12.6 | 72.9±15.3 | 39.8±26.3 | Max[MEAN] <sub>JRW</sub>  |
| <b>NNE</b>            | B  | 60.51±9.78    | 66.9±7.7  | 66.9±10.6 | 67.0±17.6 | Min[STD] <sub>R3D</sub>   |
|                       | F  | 68.17±10.32   | 74.2±7.7  | 71.9±12.8 | 77.8±15.1 | Mean[STD] <sub>JRW</sub>  |
| N <sub>HIL</sub> = 20 | B  | 59.06±11.82   | 66.5±10.2 | 67.2±14.6 | 64.9±18.9 | Max[STD] <sub>R3D</sub>   |
|                       | F  | 65.24±9.82    | 71.4±8.1  | 70.1±12.5 | 73.4±16.3 | Max[STD] <sub>JRW</sub>   |
| <b>SVM</b>            | B  | 57.56±14.65   | 66.1±9.8  | 70.3±14.9 | 59.7±21.6 | Mean[STD] <sub>JRW</sub>  |
|                       | F  | 49.77±13.33   | 66.3±18.0 | 55.6±25.7 | 59.7±21.6 | Mean[STD] <sub>JRW</sub>  |
| Linear                | B  | 49.64±9.65    | 57.3±7.8  | 58.7±14.3 | 55.0±17.7 | Mean[STD] <sub>R3D</sub>  |
|                       | F  | 51.55±10.21   | 58.6±8.2  | 60.1±13.0 | 56.2±17.4 | Max[STD] <sub>R3D</sub>   |
| <b>SVM</b>            | B  | 52.42±11.15   | 61.3±7.1  | 67.6±10.2 | 51.4±17.7 | Mean[STD] <sub>JRW</sub>  |
|                       | F  | 50.82±10.51   | 60.8±8.5  | 67.9±13.8 | 49.7±16.7 | Max[MEAN] <sub>R3D</sub>  |

**Table S6. Multi measurements - Holdout train/test = 0.5/0.5 - 100 iterations - Data from FS - Early OA**

| Methods    | FS                    | Adj. Acc. (%) | Acc. (%)  | Sens. (%) | Spec. (%) | Data                       |
|------------|-----------------------|---------------|-----------|-----------|-----------|----------------------------|
| <b>DIA</b> | B                     | 64.31±9.81    | 71.0±7.8  | 69.8±15.1 | 72.4±14.0 | Min[STD] <sub>Jr3D</sub>   |
|            | F                     | 73.38±8.36    | 78.6±6.9  | 80.5±11.4 | 76.3±11.9 | Min[STD] <sub>JrRW</sub>   |
| <b>DIA</b> | B                     | 51.47±16.14   | 66.8±8.9  | 81.9±18.2 | 48.3±24.6 | Max[STD] <sub>Jr3D</sub>   |
|            | F                     | 59.52±14.06   | 71.2±9.1  | 81.8±14.2 | 58.1±21.2 | Min[STD] <sub>Jr3D</sub>   |
| <b>LGR</b> | B                     | 58.53±11.69   | 64.7±10.3 | 62.8±15.5 | 66.9±15.3 | Min[MEAN] <sub>Jr3D</sub>  |
|            | Linear                |               |           |           |           | Mean[MEAN] <sub>JrRW</sub> |
| <b>LGR</b> | F                     | 67.33±15.29   | 75.2±10.0 | 81.3±12.8 | 67.8±20.3 | Mean[MEAN] <sub>JrRW</sub> |
|            | B                     | 54.00±13.58   | 61.8±12.2 | 63.5±18.4 | 59.6±18.5 | Max[STD] <sub>JrRW</sub>   |
| <b>LGR</b> | F                     | 44.51±15.65   | 52.6±12.7 | 53.2±16.7 | 51.8±23.3 | Max[STD] <sub>Jr3D</sub>   |
|            | B                     | 65.65±9.42    | 71.7±7.7  | 71.0±13.5 | 72.7±14.3 | Mean[STD] <sub>Jr3D</sub>  |
| <b>LNR</b> | F                     | 65.38±12.18   | 72.8±8.0  | 77.4±11.9 | 67.2±17.8 | Mean[MEAN] <sub>JrRW</sub> |
|            | B                     | 48.25±13.63   | 56.1±12.6 | 56.5±17.3 | 55.4±20.4 | Min[MEAN] <sub>JrRW</sub>  |
| <b>LNR</b> | F                     | 47.49±14.08   | 54.9±12.8 | 57.1±17.3 | 52.1±19.3 | Max[STD] <sub>Jr3D</sub>   |
|            | B                     | 62.06±12.15   | 68.5±10.4 | 67.9±15.6 | 69.1±16.6 | Mean[MEAN] <sub>Jr3D</sub> |
| <b>KNN</b> | F                     | 59.24±12.87   | 66.0±11.0 | 64.3±14.9 | 68.0±19.1 | Max[MEAN] <sub>JrRW</sub>  |
|            | k = 3                 |               |           |           |           | Min[STD] <sub>JrRW</sub>   |
| <b>KNN</b> | B                     | 60.32±11.58   | 68.1±9.3  | 72.2±14.4 | 63.2±18.2 | Mean[MEAN] <sub>Jr3D</sub> |
|            | k = 5                 |               |           |           |           | Min[STD] <sub>JrRW</sub>   |
| <b>NAB</b> | B                     | 67.16±11.31   | 73.7±8.4  | 76.2±13.1 | 70.7±16.1 | Min[MEAN] <sub>JrRW</sub>  |
|            | F                     | 63.41±9.81    | 69.4±8.1  | 71.6±11.4 | 66.7±14.9 | Mean[STD] <sub>Jr3D</sub>  |
| <b>NNE</b> | B                     | 50.6±12.05    | 61.6±9.5  | 71.1±16.8 | 50.0±19.5 | Min[MEAN] <sub>Jr3D</sub>  |
|            | N <sub>HIL</sub> = 10 |               |           |           |           | Min[STD] <sub>JrRW</sub>   |
| <b>NNE</b> | F                     | 51.99±17.73   | 64.3±10.2 | 75.7±16.9 | 50.3±25.5 | Min[STD] <sub>Jr3D</sub>   |
|            | B                     | 57.35±12.87   | 65.9±9.4  | 63.3±17.9 | 69.2±19.1 | Mean[MEAN] <sub>Jr3D</sub> |
| <b>NNE</b> | F                     | 54.22±12.5    | 62.0±9.1  | 53.5±17.6 | 72.4±14.2 | Mean[STD] <sub>JrRW</sub>  |
|            | B                     | 62.44±9.46    | 69.1±8.0  | 65.4±14.0 | 73.6±14.2 | Mean[MEAN] <sub>Jr3D</sub> |
| <b>SVM</b> | Linear                | 68.8±12.18    | 75.6±9.1  | 77.3±14.1 | 73.6±16.9 | Min[STD] <sub>JrRW</sub>   |
|            | N <sub>HIL</sub> = 20 |               |           |           |           | Mean[MEAN] <sub>JrRW</sub> |
| <b>SVM</b> | B                     | 51.28±11.55   | 58.4±9.5  | 56.6±15.5 | 60.4±17.2 | Mean[MEAN] <sub>Jr3D</sub> |
|            | Linear                |               |           |           |           | Max[STD] <sub>JrRW</sub>   |
| <b>SVM</b> | F                     | 53.12±11.75   | 60.4±9.8  | 61.6±14.7 | 58.9±18.6 | Min[MEAN] <sub>Jr3D</sub>  |
|            | Quadratic             |               |           |           |           | Max[STD] <sub>JrRW</sub>   |
| <b>DTR</b> | B                     | 59.35±14.05   | 66.7±9.9  | 69.5±13.6 | 63.3±20.6 | Max[STD] <sub>Jr3D</sub>   |
|            | F                     | 60.87±13.78   | 67.5±10.5 | 67.1±16.9 | 68.1±16.6 | Min[STD] <sub>JrRW</sub>   |
| <b>TBG</b> | B                     | 50.54±9.82    | 58.5±7.5  | 55.0±14.7 | 62.8±18.0 | Mean[MEAN] <sub>Jr3D</sub> |
|            | N <sub>T</sub> = 10   |               |           |           |           | Max[STD] <sub>Jr3D</sub>   |
| <b>TBG</b> | B                     | 56.97±12.44   | 64.2±9.8  | 62.5±16.0 | 66.2±18.0 | Max[STD] <sub>JrRW</sub>   |
|            | N <sub>T</sub> = 20   |               |           |           |           | Min[MEAN] <sub>Jr3D</sub>  |

# Principal Component Analysis (PCA)

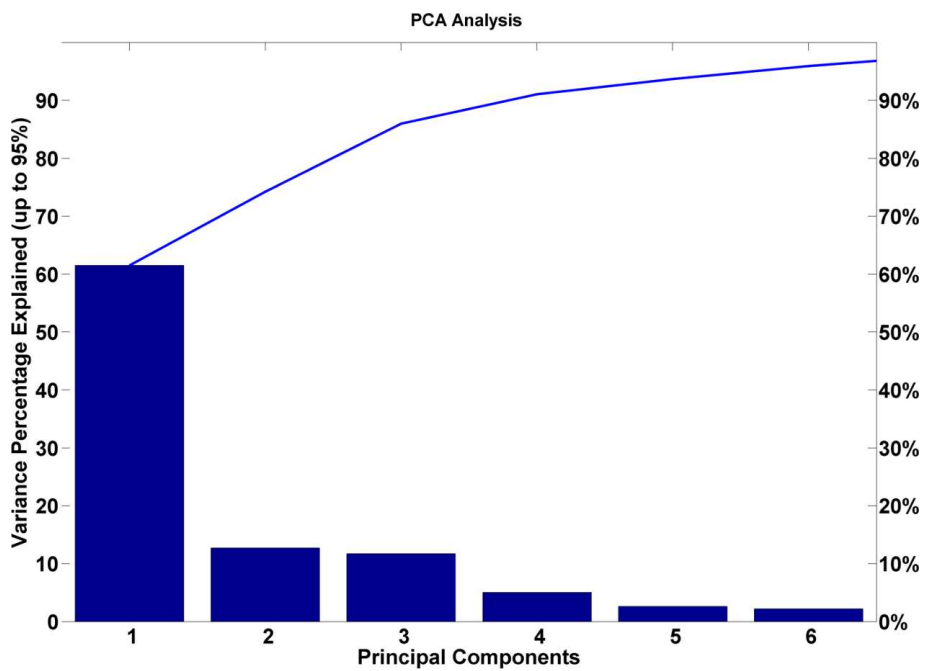



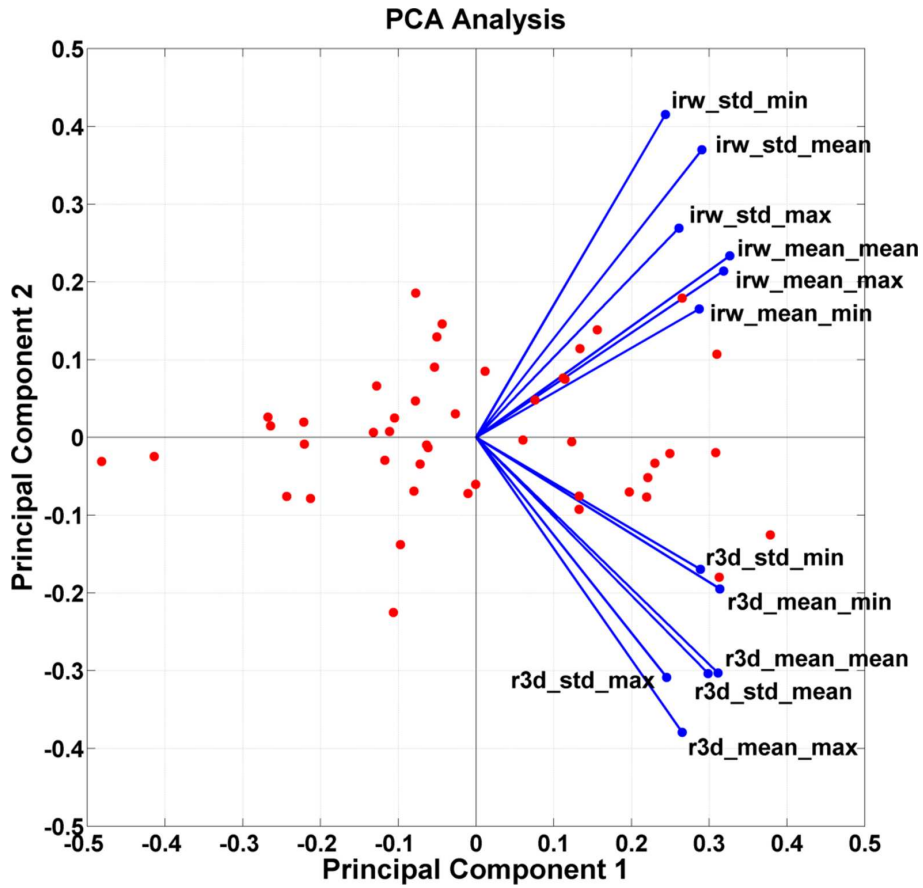

**Figure S2. Biplot of PCA results.** The axes in the biplot represent the principal components, and the observed variables are represented as vectors (in blue). Here, sodium data measurements are represented in red in the 2D space of the two first components.

**Table S7. Classification of all OA vs. controls for sodium measurements after PCA, with holdout cross-validation of the data (train ratio = test ratio = 0.5) and 100 iterations.** The best results for each classifier were selected and then ranked by level of adjusted (Adj.) accuracy. The 4 first principal components were used for classification, as they represent 91% of the variance of the whole data described by the 12 initial sodium variables. Results are shown as mean  $\pm$  standard deviation.  $N_{HL}$  = number of hidden layers,  $N_T$  = number of trees, PCs = principal components.

| Rank | Methods    | Options     | PCs        | Adj. Accuracy (%) | Accuracy (%)    | Sensitivity (%) | Specificity (%) |
|------|------------|-------------|------------|-------------------|-----------------|-----------------|-----------------|
| 1    | <b>LNR</b> | Linear      | 1, 2, 3, 4 | 62.24 $\pm$ 11.23 | 69.9 $\pm$ 8.2  | 73.9 $\pm$ 13.6 | 63.7 $\pm$ 16.8 |
| 2    | <b>DIA</b> | Linear      | 1, 2, 3, 4 | 61.90 $\pm$ 11.83 | 71.0 $\pm$ 8.80 | 77.2 $\pm$ 14.1 | 61.2 $\pm$ 16.5 |
| 3    | <b>SVM</b> | Linear      | 1, 2, 3, 4 | 61.38 $\pm$ 9.57  | 68.3 $\pm$ 7.3  | 66.8 $\pm$ 11.7 | 70.6 $\pm$ 18.0 |
| 4    | <b>LGR</b> | Linear      | 1, 2, 3, 4 | 59.16 $\pm$ 12.79 | 69.5 $\pm$ 8.4  | 76.4 $\pm$ 13.3 | 58.8 $\pm$ 19.9 |
| 5    | <b>NAB</b> |             | 1, 2, 3, 4 | 58.55 $\pm$ 10.51 | 68.1 $\pm$ 8.2  | 76.3 $\pm$ 12.0 | 55.4 $\pm$ 14.5 |
| 6    | <b>KNN</b> | k = 3       | 1, 2, 3, 4 | 58.10 $\pm$ 8.04  | 64.7 $\pm$ 7.2  | 57.1 $\pm$ 10.7 | 76.4 $\pm$ 14.9 |
| 7    | <b>SVM</b> | Quadratic   | 1, 2, 3, 4 | 57.79 $\pm$ 11.66 | 63.9 $\pm$ 9.4  | 62.9 $\pm$ 14.0 | 65.4 $\pm$ 16.6 |
| 8    | <b>KNN</b> | k = 5       | 1, 2, 3, 4 | 56.92 $\pm$ 8.88  | 63.6 $\pm$ 7.3  | 60.4 $\pm$ 11.8 | 68.4 $\pm$ 17.4 |
| 9    | <b>DIA</b> | Quadratic   | 1, 2, 3, 4 | 54.53 $\pm$ 12.83 | 67.2 $\pm$ 7.9  | 77.8 $\pm$ 14.0 | 50.8 $\pm$ 19.6 |
| 10   | <b>LNR</b> | Quadratic   | 1, 2, 3, 4 | 53.80 $\pm$ 12.30 | 61.2 $\pm$ 10.4 | 62.7 $\pm$ 16.0 | 58.9 $\pm$ 17.8 |
| 11   | <b>LGR</b> | Quadratic   | 1, 2, 3, 4 | 51.53 $\pm$ 11.81 | 58.8 $\pm$ 10.0 | 58.8 $\pm$ 14.4 | 58.9 $\pm$ 19.2 |
| 12   | <b>TBG</b> | $N_T=20$    | 1, 2, 3, 4 | 48.76 $\pm$ 11.95 | 58.5 $\pm$ 10.0 | 64.1 $\pm$ 16.5 | 49.8 $\pm$ 17.8 |
| 13   | <b>TBG</b> | $N_T=10$    | 1, 2, 3, 4 | 48.26 $\pm$ 11.57 | 57.2 $\pm$ 9.2  | 59.4 $\pm$ 16.3 | 53.8 $\pm$ 20.2 |
| 14   | <b>DTR</b> |             | 1, 2, 3, 4 | 46.42 $\pm$ 11.85 | 57.9 $\pm$ 8.8  | 65.4 $\pm$ 16.9 | 46.3 $\pm$ 19.3 |
| 15   | <b>NNE</b> | $N_{HL}=20$ | 1, 2, 3, 4 | 44.34 $\pm$ 15.1  | 54.7 $\pm$ 11.6 | 50.0 $\pm$ 21.0 | 62.1 $\pm$ 25.6 |
| 16   | <b>NNE</b> | $N_{HL}=10$ | 1, 2, 3, 4 | 36.94 $\pm$ 14.91 | 52.3 $\pm$ 11.4 | 63.6 $\pm$ 21.4 | 34.6 $\pm$ 24.0 |

**Table S8. Classification of early OA vs. controls for sodium measurements after PCA, with holdout cross-validation of the data (train ratio = test ratio = 0.5) and 100 iterations.** The best results for each classifier were selected and then ranked by level of adjusted (Adj.) accuracy. The 4 first principal components were used for classification, as they represent 91% of the variance of the whole data described by the 12 initial sodium variables. Results are shown as mean  $\pm$  standard deviation.  $N_{HL}$  = number of hidden layers,  $N_T$  = number of trees, PCs = principal components.

| Rank | Methods    | Options     | PCs        | Adj. Accuracy (%) | Accuracy (%)     | Sensitivity (%) | Specificity (%) |
|------|------------|-------------|------------|-------------------|------------------|-----------------|-----------------|
| 1    | <b>DIA</b> | Linear      | 1, 2, 3, 4 | 62.75 $\pm$ 11.77 | 70.0 $\pm$ 9.1   | 73.9 $\pm$ 13.9 | 65.1 $\pm$ 16.2 |
| 2    | <b>SVM</b> | Linear      | 1, 2, 3, 4 | 62.55 $\pm$ 11.99 | 69.8 $\pm$ 8.4   | 68.6 $\pm$ 13.8 | 71.2 $\pm$ 18.8 |
| 3    | <b>LNR</b> | Linear      | 1, 2, 3, 4 | 61.92 $\pm$ 11.82 | 69.2 $\pm$ 8.6   | 73.1 $\pm$ 13.9 | 64.6 $\pm$ 17.4 |
| 4    | <b>LGR</b> | Linear      | 1, 2, 3, 4 | 60.60 $\pm$ 12.06 | 67.7 $\pm$ 9.6   | 69.9 $\pm$ 15.1 | 64.9 $\pm$ 16.6 |
| 5    | <b>SVM</b> | Quadratic   | 1, 2, 3, 4 | 58.08 $\pm$ 13.47 | 65.3 $\pm$ 10.8  | 62.8 $\pm$ 16.3 | 68.2 $\pm$ 18.7 |
| 6    | <b>KNN</b> | k = 3       | 1, 2, 3, 4 | 57.91 $\pm$ 10.97 | 66.4 $\pm$ 9.0   | 57.1 $\pm$ 14.1 | 77.7 $\pm$ 17.3 |
| 7    | <b>NAB</b> |             | 1, 2, 3, 4 | 57.47 $\pm$ 11.55 | 66.9 $\pm$ 8.6   | 73.5 $\pm$ 16.6 | 58.9 $\pm$ 16.8 |
| 8    | <b>KNN</b> | k = 5       | 1, 2, 3, 4 | 56.99 $\pm$ 11.35 | 66.4 $\pm$ 9.9   | 57.1 $\pm$ 15.6 | 77.7 $\pm$ 19.7 |
| 9    | <b>LNR</b> | Quadratic   | 1, 2, 3, 4 | 55.66 $\pm$ 12.51 | 62.4 $\pm$ 11.0  | 60.2 $\pm$ 15.7 | 65.1 $\pm$ 17.4 |
| 10   | <b>DIA</b> | Quadratic   | 1, 2, 3, 4 | 54.25 $\pm$ 13.17 | 65.2 $\pm$ 8.9   | 77.0 $\pm$ 14.6 | 50.8 $\pm$ 18.0 |
| 11   | <b>LGR</b> | Quadratic   | 1, 2, 3, 4 | 51.65 $\pm$ 12.68 | 59.4 $\pm$ 11.2  | 59.2 $\pm$ 17.0 | 59.7 $\pm$ 19.5 |
| 12   | <b>TBG</b> | $N_T=20$    | 1, 2, 3, 4 | 50.62 $\pm$ 11.88 | 58.6 $\pm$ 9.8   | 60.5 $\pm$ 15.9 | 56.2 $\pm$ 18.5 |
| 13   | <b>TBG</b> | $N_T=10$    | 1, 2, 3, 4 | 50.50 $\pm$ 11.95 | 56.8 $\pm$ 10.4  | 55.2 $\pm$ 16.9 | 58.8 $\pm$ 16.1 |
| 14   | <b>NNE</b> | $N_{HL}=20$ | 1, 2, 3, 4 | 50.50 $\pm$ 14.72 | 61.4 $\pm$ 10.2  | 51.6 $\pm$ 22.2 | 73.2 $\pm$ 20.4 |
| 15   | <b>DTR</b> |             | 1, 2, 3, 4 | 47.20 $\pm$ 10.89 | 57.8 $\pm$ 9.0   | 64.8 $\pm$ 18.3 | 49.1 $\pm$ 18.8 |
| 16   | <b>NNE</b> | $N_{HL}=10$ | 1, 2, 3, 4 | 33.00 $\pm$ 16.11 | 48.10 $\pm$ 13.2 | 60.3 $\pm$ 23.3 | 33.2 $\pm$ 29.1 |

# ROC Analysis

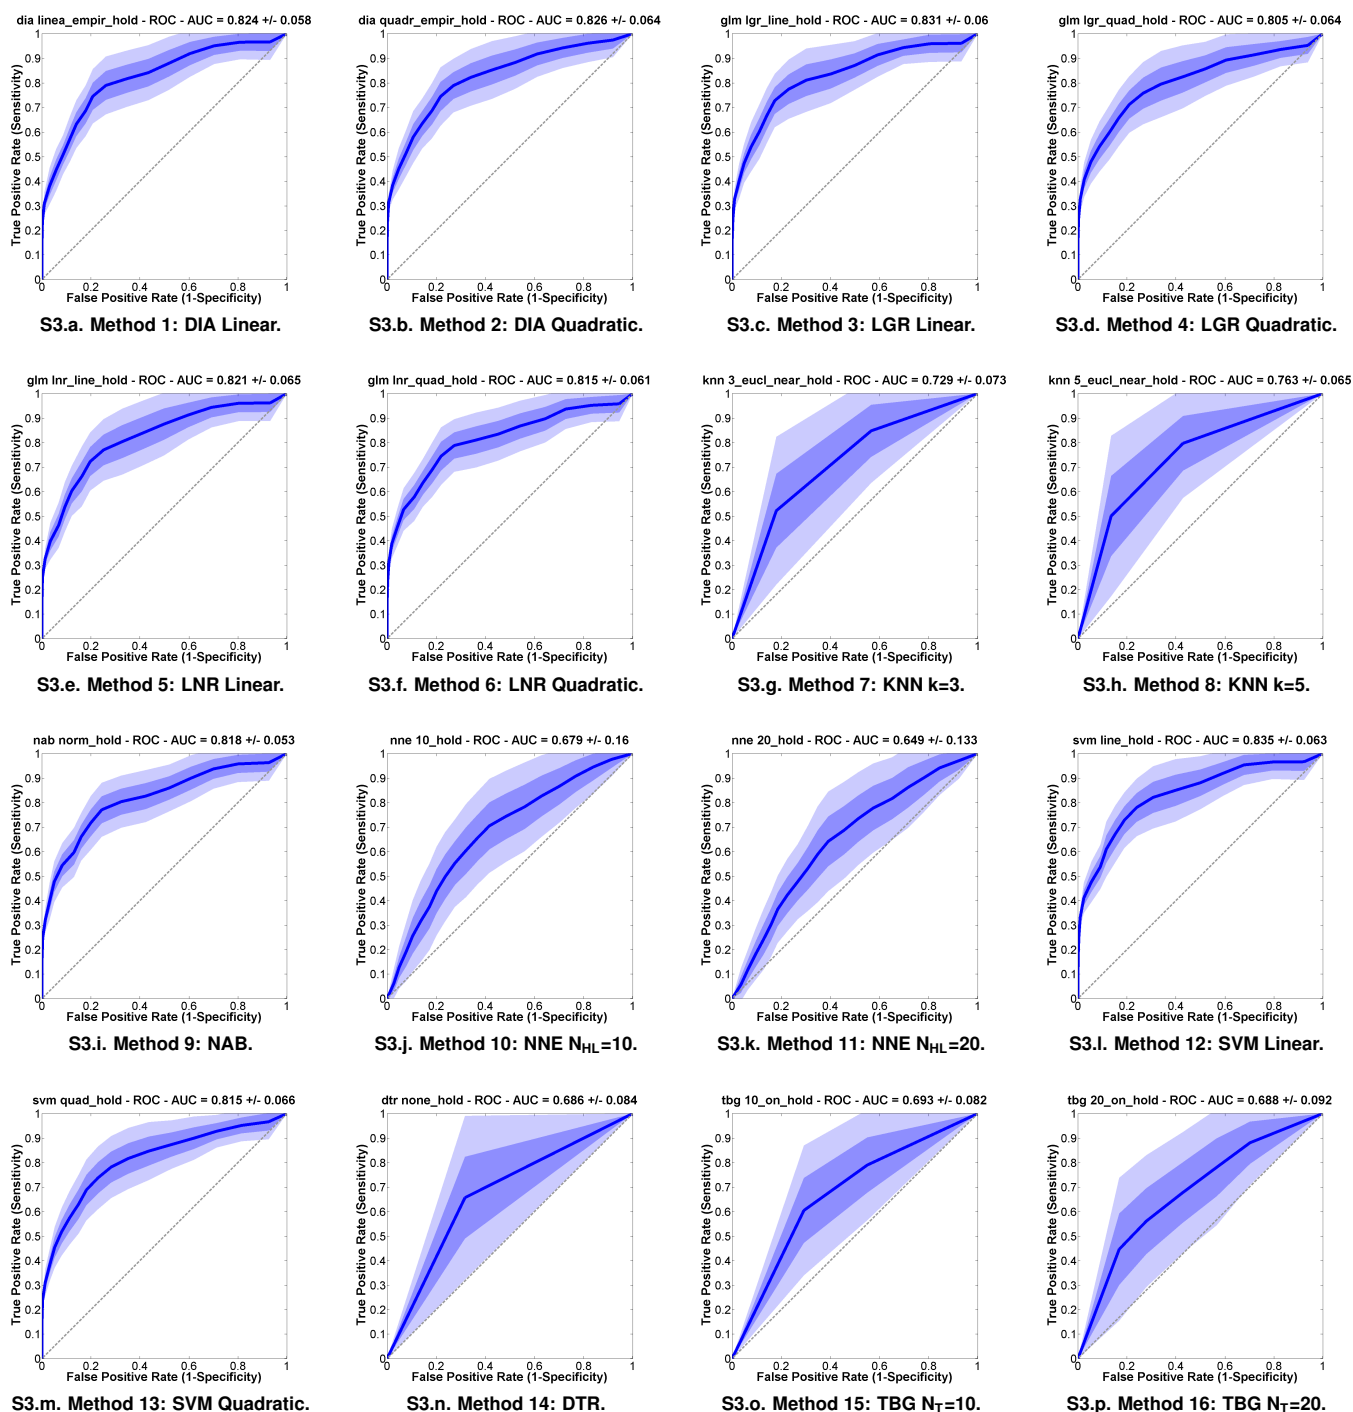

**Figure S3. ROC curves of classification methods 1 to 16 (see Table 1).** The ROC curves were calculated for the classification of all OA vs. controls data using the  $\text{Min}[\text{STD}]_{\text{IRW}}$  variable only, with holdout cross-validation of the data (train ratio = test ratio = 0.5) and 100 iterations. Mean and standard deviation (std) of area under the curve (AUC) was calculated over 100 iterations. The (darker) blue area represents the ROC curve  $\pm 1 \times \text{std}$ , the lighter blue area represents the ROC curve  $\pm 2 \times \text{std}$ .

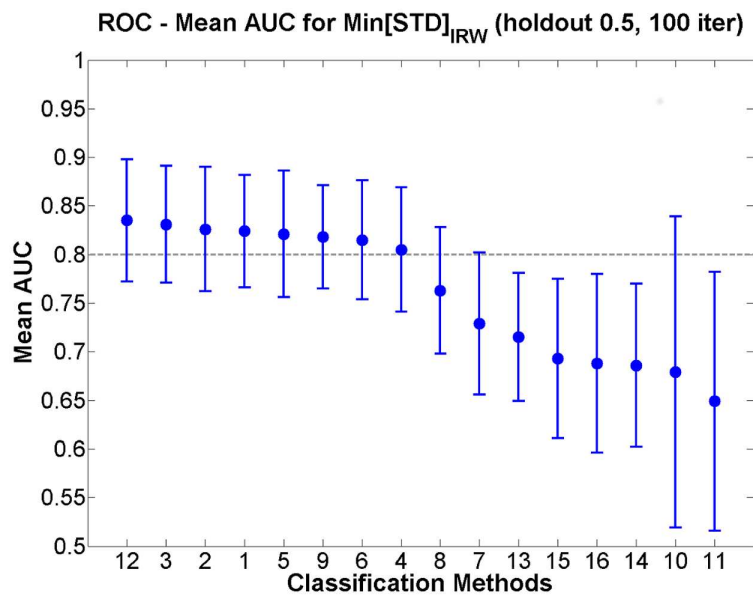

**Figure S4. Mean areas under the curve (AUC)  $\pm$  std, for all 16 classification methods (from Fig. S3).** The AUCs were calculated for the classification of all OA vs. controls data using the **Min[STD]<sub>IRW</sub>** variable only, with holdout cross-validation of the data (train ratio = test ratio = 0.5) and 100 iterations. The mean AUCs are ranked from highest to lowest (left to right). Note that the 8 methods with the highest AUC (>0.8) correspond to the 8 most performing classification methods shown in Table 5 of the article, with the highest (adjusted) accuracy, for the same data and same variable.
